# Supplementary material for: Compositional Changes in the Vaginal Bacterial Microbiome of Healthy Pregnant Women across the Three Gestational Trimesters in Ismailia, Egypt
Source: MDPI journal article supplement (doi:10.3390/microorganisms11010139), 2023-01-05
Supplement: s1 [file s1]

## # R script of collective taxonomy chart of relative abundances of taxa at phylum, genus and species levels using facet wrap package:

```
# R version 4.2.0
#load packages
library(tidyverse)
library(ggplot2)
library(readxl)

#import phyla data
Phyla <- read_excel("File path")
View(Phyla)

# Plotting Phyla with ggplot
Phyla_plot <- ggplot(Phyla, aes(x = Pregnancy_status, y = Relative_abundance, fill = Phylum)) +
  geom_bar(position = position_dodge(),
  stat="identity") +
  facet_wrap(~Phylum) +
  theme(axis.text.x =
  element_text(colour="gray0",size=8,angle=90,hjust=.5,vjust=.5,face="plain"),
  axis.text.y = element_text(colour="gray0",size=10,angle=0,hjust=1,vjust=0,face="plain"),
  axis.title.x = element_text(colour="gray0",size=12,angle=0,hjust=.5,vjust=0,face="bold"),
  axis.title.y = element_text(colour="gray0",size=12,angle=90,hjust=.5,vjust=.5,face="bold")) +
  theme(legend.text=element_text(size=8)) +
  theme(legend.title=element_text(size=10, face = "bold")) +
  ggtitle("Relative abundance of taxa at phylum level")+
  theme(plot.title = element_text(hjust = 0.5, size = 12, face = "bold"))
Phyla_plot
P1 <- Phyla_plot
P1

#import genus data
genera <- read_excel("File path")
View(genera)
#genera plot with ggplot
Genera_plot <- ggplot(genera, aes(x = Pregnancy_status, y = Relative_abundance, fill = Genus)) +
  geom_bar(position = position_dodge(),
  stat="identity") +
  facet_wrap(~Genus) +
  theme(axis.text.x = element_text(colour="gray0",size=8,angle=90,hjust=.5,vjust=.5,face="plain"),
```

```

axis.text.y = element_text(colour="gray0",size=10,angle=0,hjust=1,vjust=0,face="plain"),
axis.title.x = element_text(colour="gray0",size=12,angle=0,hjust=.5,vjust=0,face="bold"),
axis.title.y = element_text(colour="gray0",size=12,angle=90,hjust=.5,vjust=.5,face="bold")) +
theme(legend.text=element_text(size=8)) +
theme(legend.title=element_text(size=10, face = "bold")) +
ggtitle("Relative abundance of taxa at genus level")+
theme(plot.title = element_text(hjust = 0.5, size = 12, face = "bold"))
Genera_plot
P2 <- Genera_plot
P2

#import species belong lactobacillus
species_lactobacillus <- read_excel("File Path")
View(species_lactobacillus)
# plot species belong lactobacillus with ggplot

species_lactobacillus_plot <-ggplot(species_lactobacillus, aes(x = Pregnancy_status, y =
Relative_abundance, fill = Species)) + geom_bar(position = position_dodge(),

stat="identity") +
  facet_wrap(~Species) +
  theme(axis.text.x =
element_text(colour="gray0",size=8,angle=90,hjust=.5,vjust=.5,face="plain"),
  axis.text.y = element_text(colour="gray0",size=10,angle=0,hjust=1,vjust=0,face="plain"),
  axis.title.x = element_text(colour="gray0",size=12,angle=0,hjust=.5,vjust=0,face="bold"),
  axis.title.y = element_text(colour="gray0",size=12,angle=90,hjust=.5,vjust=.5,face="bold")) +
  theme(legend.text=element_text(size=8)) +
  theme(legend.title=element_text(size=10, face = "bold")) +
  ggtitle("Relative abundance of taxa at species level belong to Lactobacillus")+
  theme(plot.title = element_text(hjust = 0, size = 12, face = "bold"))

final_species_lactobacillus_plot <- species_lactobacillus_plot + ylim(0, 1)

final_species_lactobacillus_plot

P3 <- final_species_lactobacillus_plot
P3

```

```

#import data not belong lactobacillus:
species_nonlactobacillus <- read_excel("File Path")
View(species_nonlactobacillus)

#Plot species_nonlactobacillus with ggplot
species_nonlactobacillus_plot <-ggplot(species_nonlactobacillus, aes(x = Pregnancy_status, y =
Relative_abundance, fill = Species)) + geom_bar(position = position_dodge(),
stat="identity")
+
facet_wrap(~Species) +
theme(axis.text.x = element_text(colour="gray0",size=8,angle=90,hjust=.5,vjust=.5,face="plain"),
axis.text.y = element_text(colour="gray0",size=10,angle=0,hjust=1,vjust=0,face="plain"),
axis.title.x = element_text(colour="gray0",size=12,angle=0,hjust=.5,vjust=0,face="bold"),
axis.title.y = element_text(colour="gray0",size=12,angle=90,hjust=.5,vjust=.5,face="bold")) +
theme(legend.text=element_text(size=8)) +
theme(legend.title=element_text(size=10, face = "bold")) +
ggtitle("Relative abundance of taxa at species level not belong to Lactobacillus")+
theme(plot.title = element_text(hjust = 0, size = 12, face = "bold"))

final_species_nonlactobacillus_plot <- species_nonlactobacillus_plot + ylim(0, 1)

final_species_nonlactobacillus_plot

P4 <- final_species_nonlactobacillus_plot

P4

#combine plots
#install.packages("cowplot")
library(cowplot)
Final_image <- plot_grid(P1, P2, P3, P4, nrow = 2, ncol = 2, rel_widths = c(1, 1), labels = c("(A)",
"(B)", "(C)", "(D)"))
Final_image
ggsave("taxonomy.tiff", units="in", width=14, height=8, dpi=300)

```

### **#R script for collective alpha diversity chart:**

```

#Load packages
library(ggstatsplot)
library(readxl)
library(ggplot2)

```

```
library(cowplot)
import data
library(readxl)
```

```
#Import alpha diversity excel tables generated by MicrobiomeAnalyst
observed_alpha_diversity_index <- read_excel("File Path")
View(observed_alpha_diversity_index)
Chao1_alpha_diversity_index <- read_excel("File Path")
View(Chao1_alpha_diversity_index)
Shannon_alpha_diversity_index <- read_excel("File Path")
View(Shannon_alpha_diversity_index)
Simpson_alpha_diversity_index <- read_excel("File Path")
View(Simpson_alpha_diversity_index)
```

```
#Plot observed_alpha_diversity_index
Observed <- ggbetweenstats(observed_alpha_diversity_index, x = pregnancy_status, y =
observed, type = "nonparametric", pairwise.display = "s", xlab = "Pregnancy_status", ylab =
"Alpha_diversity: Observed", centrality.label.args = list(size = 3), centrality.point.args = list(size =
5, color = "#000000"), point.args = list(position = ggplot2::position_jitterdodge(dodge.width =
0.6), alpha = 1, size = 4, stroke = 0), ggtheme = ggplot2::theme(axis.text = element_text(color =
"black", size = 10), axis.title = element_text(face = "bold", colour = "black", size = 12),
panel.border = element_rect (colour = "black", size = 1, fill = NA), panel.background =
element_rect(fill = "gray97", color = "gray97")))
```

Observed

```
#To change colours
```

```
p1 <- Observed + ggplot2::scale_fill_manual(values = c("#006400", "#8B0000", "#0000CD",
"#EEC900"), aesthetics = c("colour", "fill"))
```

p1

```
#Plot Chao1_alpha-diversity-index
```

```
Chao1 <- ggbetweenstats(Chao1_alpha_diversity_index, x = pregnancy_status, y = chao1, type =
"nonparametric", pairwise.display = "s", xlab = "Pregnancy_status", ylab = "Alpha_diversity:
Chao1", centrality.label.args = list(size = 3), centrality.point.args = list(size = 5, color =
"#000000"), point.args = list(position = ggplot2::position_jitterdodge(dodge.width = 0.6), alpha =
1, size = 4, stroke = 0),
ggtheme = ggplot2::theme(axis.text = element_text(color = "black", size = 10), axis.title =
element_text(face = "bold", colour = "black", size = 12), panel.border = element_rect (colour =
"black", size = 1, fill = NA), panel.background = element_rect(fill = "gray97", color = "gray97")))
```

```
p2 <- Chao1 + ggplot2::scale_fill_manual(values = c("#006400", "#8B0000", "#0000CD",
"#EEC900"), aesthetics = c("colour", "fill"))
```

p2

```
#Plot Shannon_alpha_diversity_index
```

```
Shanon <- ggbetweenstats(Shannon_alpha_diversity_index, x = pregnancy_status, y = shannon,
type = "nonparametric", pairwise.display = "s", xlab = "Pregnancy_status", ylab =
"Alpha_diversity: Shannon", centrality.label.args = list(size = 3), centrality.point.args = list(size =
5, color = "#000000"), point.args = list(position = ggplot2::position_jitterdodge(dodge.width =
0.6), alpha = 1, size = 4, stroke = 0),
ggtheme = ggplot2::theme(axis.text = element_text(color = "black", size = 10), axis.title =
element_text(face = "bold", colour = "black", size = 12), panel.border = element_rect (colour =
"black", size = 1, fill = NA), panel.background = element_rect(fill = "gray97", color = "gray97")))
```

```
p3 <- Shanon + ggplot2::scale_fill_manual(values = c("#006400", "#8B0000", "#0000CD",
"#EEC900"), aesthetics = c("colour", "fill"))
```

p3

```
#Plot Simpson_alpha_diversity_index
```

```
Simpson <- ggbetweenstats(Simpson_alpha_diversity_index, x = pregnancy_status, y = simpson,
type = "nonparametric", pairwise.display = "s", xlab = "Pregnancy_status", ylab =
"Alpha_diversity: Simpson", centrality.label.args = list(size = 3), centrality.point.args = list(size =
5, color = "#000000"), point.args = list(position = ggplot2::position_jitterdodge(dodge.width =
0.6), alpha = 1, size = 4, stroke = 0), ggtheme = ggplot2::theme(axis.text = element_text(color =
"black", size = 10), axis.title = element_text(face = "bold", colour = "black", size = 12),
panel.border = element_rect (colour = "black", size = 1, fill = NA), panel.background =
element_rect(fill = "gray97", color = "gray97")))
```

```
p4 <- pf + ggplot2::scale_fill_manual(values = c("#006400", "#8B0000", "#0000CD", "#EEC900"),
aesthetics = c("colour", "fill"))
```

p4

```
#combine plots
```

```
install.packages("cowplot")
```

```
install.packages("ggpubr ")
```

```
library(cowplot)
```

```
library(ggpubr)
```

```
final_image <- plot_grid(p1, p2, p3, p4, nrow = 2, ncol = 2, rel_widths = c(1, 1), labels = c("(A)",
"(B)", "(C)", "(D)"))
```

final\_image

ggsave("Alpha-diversity.tiff", units="in", width=12, height=6, dpi=300)

### #R script for Pielou evenness alpha diversity chart:

```
#import data
library(readxl)
pielou_evenness_alpha_diversity <- read_excel("File Path")
View(pielou_evenness_alpha_diversity)

#load package
library(ggstatsplot)
library(tidyverse)
library(ggplot2)

pielou_evenness_plot <- ggbetweenstats(pielou_evenness_alpha_diversity, x = pregnancy_status, y
= pielou_evenness, type = "nonparametric",
    pairwise.display = "all", xlab = "Pregnancy_status", ylab = "Alpha_diversity:
Pielou_evenness",
    centrality.label.args = list(size = 4), centrality.point.args = list(size = 5, color =
"#000000"),
    point.args = list(position = ggplot2::position_jitterdodge(dodge.width = 0.6), alpha
= 1, size = 4, stroke = 0),
    ggtheme = ggplot2::theme(axis.text = element_text(color = "black", size = 10),
    axis.title = element_text(face = "bold", colour = "black", size = 12),
panel.border = element_rect (colour = "black", size = 1, fill = NA),
    panel.background = element_rect(fill = "gray97", color = "gray97"))))

pielou_evenness_plot

#To change colours

pielou_evenness_plot_modified <- pielou_evenness_plot + ggplot2::scale_fill_manual(values =
c("#006400", "#8B0000", "#0000CD", "#EEC900"), aesthetics = c("colour", "fill"))

pielou_evenness_plot_modified

ggsave("pielou_evenness.tiff", units="in", width=6, height=6, dpi=300)
```

### #R script for correlation at phylum level:

```
#import data:
library(readxl)
correlation_phylum <- read_excel("File Path")
View(correlation_phylum)

#Calculate correlation
library("Hmisc")
correlation_result <- rcorr(as.matrix(correlation_phylum), type = "spearman")
correlation_result

#To calculate r and p values for n samples and save in tsv file
#Extract p value
correlation_p_value <- correlation_result $P
correlation_p_value

#Round p value
p_value <- round(correlation_p_value, 2)

#Extract r value
correlation_r_value <- correlation_result$r
correlation_r_value

#Round r value
r_value <- round(correlation_r_value, 2)

#To make tsv output file
sink("correlation_phyla.tsv")
correlation_result <- rcorr(as.matrix(correlation_phylum), type = "spearman")
correlation_result

correlation_p_value <- correlation_result $P
correlation_p_value
round(correlation_p_value, 2)
correlation_r_value <- correlation_result $r
correlation_r_value
round(correlation_r_value, 2)
correlation_n_phyla <- correlation_result$n
```

```
correlation_n_phyla  
sink()
```

```
#Plot correlation  
library("colorRamps")  
library(heatmaply)  
library(viridis)  
library(plotly)  
library(shiny)
```

```
#Palette for correlation plot  
my_palette2 <- colorRampPalette(c("blue4", "lightcyan1", "darkred"))(n = 299)
```

```
p1 <- heatmaply_cor(r_value  
,limits = c(-0.5, 1), colors = my_palette2, column_text_angle = -90, fontsize_row = 14,  
fontsize_col = 14, plot_method = "plotly")  
  
p1
```

```
#import data for comparative correlation phyla  
library(readxl)  
Comparative_correlation_phylum <- read_excel("File Path")  
View(Comparative_correlation_phylum)  
#load packages for pairwise graphical comparison of several distributions  
library(PerformanceAnalytics)  
library(tidyverse)  
library(GGally)
```

```
#Plot comparative correlation  
p2 <- ggpairs(Comparative_correlation_phylum, columns = 1:7,  
  aes(colour = Pregnancy_Trimester),  
  lower = list(continuous = "smooth"),  
  upper = list(continuous = wrap("cor", method = "spearman", size = 3.5)))  
  
p2  
ggsave("Comparative_correlation_phylum.tiff", units="in", width=10, height=7, dpi=300)
```



### R script for correlation at genus level:

```
#import data:
library(readxl)
correlation_genus <- read_excel("File Path")
View(correlation_genus)

#Calculate correlation
library("Hmisc")
correlation_result_genera <- rcorr(as.matrix(correlation_genus), type = "spearman")
correlation_result_genera

#To calculate r and p values for n samples and save in tsv file
#Extract p value
correlation_p_value_genera <- correlation_result_genera $P
correlation_p_value_genera

#Round p value
p_value_genera <- round(correlation_p_value_genera, 2)

#Extract r value
correlation_r_value_genera <- correlation_result_genera $r
correlation_r_value_genera

#Round r value
r_value_genera <- round(correlation_r_value_genera, 2)

#To make tsv output file
sink("correlation_genera.tsv")
correlation_result_genera <- rcorr(as.matrix(correlation_genus), type = "spearman")
correlation_result_genera

correlation_p_value_genera <- correlation_result_genera $P
correlation_p_value_genera
round(correlation_p_value_genera, 2)
correlation_r_value_genera <- correlation_result_genera $r
correlation_r_value_genera
round(correlation_r_value_genera, 2)
correlation_n_genera <- correlation_result_genera $n
correlation_n_genera
```

```
sink()
```

```
#Plot correlation
```

```
library("colorRamps")
```

```
library(heatmaply)
```

```
library(viridis)
```

```
library(plotly)
```

```
library(shiny)
```

```
#Palette for correlation plot
```

```
my_palette2 <- colorRampPalette(c("blue4", "lightcyan1", "darkred"))(n = 299)
```

```
p3 <- heatmaply_cor(r_value_genera
```

```
,limits = c(-0.5, 1), colors = my_palette2, column_text_angle = -90, fontsize_row = 14,  
fontsize_col = 14, plot_method = "plotly")
```

```
p3
```

```
#to close any opened plot
```

```
dev.off()
```

```
#import data for comparative correlation genera
```

```
library(readxl)
```

```
Comparative_correlation_genus <- read_excel("File Path")
```

```
View(Comparative_correlation_genus)
```

```
#load packages for pairwise graphical comparison of several distributions
```

```
library(PerformanceAnalytics)
```

```
library(tidyverse)
```

```
library(GGally)
```

```
#Plot comparative correlation
```

```
p4 <- ggpairs(Comparative_correlation_genus, columns = 1:10,
```

```
  aes(colour = Pregnancy_Trimester),
```

```
  lower = list(continuous = "smooth"),
```

```
  upper = list(continuous = wrap("cor", method = "spearman", size = 3.5)))
```

```
p4
```

```
#to change font size
```

```
final_figure <- p4 + theme(text = element_text(size = 8))
```

```
final_figure
```

```
#then export as PNG image.
```

### #R script for correlation at species level:

```
#import data:
library(readxl)
correlation_species <- read_excel("File Path")
View(correlation_species)

#Calculate correlation
library("Hmisc")
correlation_result_species <- rcorr(as.matrix(correlation_species), type = "spearman")
correlation_result_species

#To calculate r and p values for n samples and save in tsv file
#Extract p value
correlation_p_value_species <- correlation_result_species $P
correlation_p_value_species

#Round p value
p_value_species <- round(correlation_p_value_species, 2)

#Extract r value
correlation_r_value_species <- correlation_result_species$r
correlation_r_value_species

#Round r value
r_value_species <- round(correlation_r_value_species, 2)

#To make tsv output file
sink("correlation_species.tsv")
correlation_result_species <- rcorr(as.matrix(correlation_species), type = "spearman")
correlation_result_species

correlation_p_value_species <- correlation_result_species $P
correlation_p_value_species
round(correlation_p_value_species, 2)
correlation_r_value_species <- correlation_result_species $r
correlation_r_value_species
round(correlation_r_value_species, 2)
correlation_n_species <- correlation_result_species$n
correlation_n_species
```

```
sink()
```

```
#Plot correlation
```

```
library("colorRamps")
```

```
library(heatmaply)
```

```
library(viridis)
```

```
library(plotly)
```

```
library(shiny)
```

```
#Palette for correlation plot
```

```
my_palette2 <- colorRampPalette(c("blue4", "lightcyan1", "darkred"))(n = 299)
```

```
p5 <- heatmaply_cor(r_value_species
```

```
,limits = c(-0.5, 1), colors = my_palette2, column_text_angle = -90, fontsize_row = 14,  
fontsize_col = 14, plot_method = "plotly")
```

```
p5
```

```
#to close any opened plot
```

```
dev.off()
```

```
#import data for comparative correlation of Lactobacillus species
```

```
library(readxl)
```

```
Comparative_correlation_species_lactobacillus <- read_excel("File Path")
```

```
View(Comparative_correlation_species_lactobacillus)
```

```
#load packages for pairwise graphical comparison of several distributions
```

```
library(PerformanceAnalytics)
```

```
library(tidyverse)
```

```
library(GGally)
```

```
#Plot comparative correlation
```

```
p6 <- ggpairs(Comparative_correlation_species_lactobacillus, columns = 1:9,  
  aes(colour = Pregnancy_Trimester),  
  lower = list(continuous = "smooth"),  
  upper = list(continuous = wrap("cor", method = "spearman", size = 3.5)))
```

```
p6
```

```
#to change font size
```

```
final_figure <- p6 + theme(text = element_text(size = 8))
```

```
final_figure
```

```
#then export as PNG image
```

```
#to know directory where output files were saved  
getwd()
```

```
#import data for comparative correlation of nonLactobacillus species
```

```
library(readxl)
```

```
Comparative_correlation_species_nonlactobacillus <- read_excel("File Path")
```

```
View(Comparative_correlation_species_nonlactobacillus)
```

```
#load packages for pairwise graphical comparison of several distributions
```

```
library(PerformanceAnalytics)
```

```
library(tidyverse)
```

```
library(GGally)
```

```
#Plot comparative correlation
```

```
p7 <- ggpairs(Comparative_correlation_species_nonlactobacillus, columns = 1:9,  
  aes(colour = Pregnancy_Trimester),  
  lower = list(continuous = "smooth"),  
  upper = list(continuous = wrap("cor", method = "spearman", size = 3.5)))
```

```
p7
```

```
#to change font size
```

```
final_figure <- p7 + theme(text = element_text(size = 8))
```

```
final_figure
```

```
#then export as PNG image
```

### **#R script for CST bar chart using facet wrap:**

#First we run the following script in Linux terminal (which is available on the Valencia github page):

The script is run as follows:

```
python3 /path/to/Valencia.py -ref /path/to/CST_profiles_012920.csv -i  
/path/to/test_dataset.csv -o /path/to/test_out -p /path/to/test
```

```
#import data
```

```
library(readxl)
```

```
cst <- read_excel("File Path")
```

```
View(cst)
```

```
load library
```

```
library(tidyverse)
```

```

library(ggplot2)

#Plot cst
ggplot(cst, aes(x = pregnancy_status, y = Total_sample_No., fill = CST)) +
  geom_bar(stat = "identity", position = "dodge") +
  facet_wrap(~CST) +
  theme(axis.text.x =
    element_text(colour="gray0",size=8,angle=90,hjust=.5,vjust=.5,face="plain"),
    axis.text.y = element_text(colour="gray0",size=10,angle=0,hjust=1,vjust=0,face="plain"),
    axis.title.x = element_text(colour="gray0",size=12,angle=0,hjust=.5,vjust=0,face="bold"),
    axis.title.y = element_text(colour="gray0",size=12,angle=90,hjust=.5,vjust=.5,face="bold")) +
  theme(legend.text=element_text(size=8)) +
  theme(legend.title=element_text(size=10, face = "bold")) +
  ggtitle("VALENCIA CST classification")+
  theme(plot.title = element_text(hjust = 0.5, size = 12, face = "bold"))

ggsave("CST_VALENCIA.tiff", units="in", width=10, height=6, dpi=300)

```
